# Supplementary material for: Novel organoid-based exploration reveals the role of LMTK3/FADS2 signaling in metastatic breast cancer progression in felines and humans
Source: Research Square preprint supplement (doi:10.21203/rs.3.rs-7396289/v1), 2025-09-09
Supplement: Supplementary file 1 [file 18b25a5b28fcbcc7837addec.xlsx]

## Sheet: Table.1 Antibody 
IF	Primary antibody	company	Catalog no.	ratio		Secondary antibody	company	Catalog no.	ratio
	HER2	novus	NB100-81957	1/100~200		H342-Cellstain®- Hoechst 33342 solution	DOJINDO LABORATORIES	H342	1/1000
	ER	abcam	EPR4097	1/100~200		Goat Anti-Rabbit IgG H&L (Alexa Fluor® 488)	abcam	ab150077	1/500
	PR	invitogen	MA112626	1/200		Goat Anti-Mouse IgG H&L (Alexa Fluor® 488)	abcam	ab150113	1/500
	LMTK3	Genetex	GTX56134	1/500		Goat Anti-Rabbit IgG H&L (Alexa Fluor® 568)	abcam	ab175471	1/500
	FADS2	abcam	ab232898	1/100
	Primary antibody	company	Catalog no.	ratio
IHC	CK8	Biolegend	904804	1/500
	CK5	Genetex	GTX113219	1/1000
	TTF1	novus	NBP2-44498-0.1mg	1/100
	Ki67	Novus	NB600-1252-0.1ml	1/100
	HER2	biovision, novus	NB100-81957	1/100
	LMTK3	Genetex	GTX56134	1/100
	FADS2	abcam	ab232898	1/100

## Sheet: Table.2 Primer　arrangement
Cat	Forward	Reverse		human	Forward	Reverse
Cat GAPDH	CTCATGACCACAGTCCATGC	TGAGCTTCCCATTCAGCTCT		human GAPDH	CGAGATCCCTCCAAAATCAA	TGTGGTCATGAGTCCTTCCA
Cat CD44	CGGAAACCTCAAATTCCAGA	TTGTTCACCAAGTGCACCAT		human FADS2	CAGGGTGGAGCTGAGAAGAG	GCCCTTCCCCTGAATCTAAG
Cat SOX2	TTTTGTCGGAGACGGAGAAG	GCCGGGCAGTGTGTACTTAT		human LMTK3	CCTACGCTGTGGTCCTCATT	CCCCTTCAGGGTTCTCAAAT
Cat YAP1	CTTGTCCGTTGCTGCTGTTA	GCCAGTTGTGGTTTTCCACT		human Bax	TTTGCTTCAGGGTTTCATCC	CAGTTGAAGTTGCCGTCAGA
Cat Bcl2	CCAAGAGGGAAACACCAGAA	GGCCCCGAAAGAAAGAATAG		human P21	GACACCACTGGAGGGTGACT	GGCGTTTGGAGTGGTAGAAA
Cat Bax	TTTGCTTCAGGGTTTCATCC	GTCCAGTTCATCTCCGATGC		human Cyclin D1	TGTTTGCAAGCAGGACTTTG	TCATCCTGGCAATGTGAGAA
Cat CyclinD1	CACACGGACTACAGGGGAGT	TCGCAGCATAAGAGTTGGTG		human Cyclin E1	CCATCCTTCTCCACCAAAGA	TTTGATGCCATCCACAGAAA
Cat Cyclin E1	TGCTGAAGATGCACACAACA	CTGGTGTGGTCACACTGTCC
Cat p21	GCGATGGAACTTCGACTTTG	AGAGTGCAGGACAGGGACAG
Cat LMTK3	GTGTGGAGACACTGCCCTTT	GGTGAGGTCGGAGGTCAGTA
Cat FADS2	AGCCCAACATCTTCCACAAG	AGGGCTGTAGGTGAGCAAGA

## Sheet: Table.3 CBC case info.
	patient no.	Age	Sex	Breed	Diagnosis	Metastasis	memo
	CBC20001	9y 10m	FS	Mix	Grade2		胞巣状乳腺癌
	CBC20002	3y 8m	FS	Mix	Grade2		basal like subtype
	CBC20003	9y	F	Mix	Grade2		腺上皮様細胞で構成
	CBC20004	no info.	no info	no info.	no info.
	CBC20005	14y 4m	FS	Persian Cats	Grade2	Lung	肺転移あり、腺房状の増殖
	CBC20006	14y	no info	American short hair	Grade2		腺管状、偽乳頭状の突出もあり
	CBC21001	12y	FS	Mix	no info.	Lymph node
	CBC21002	10y	no info	Mix	no info.	Lymph node	リンパ節転移あり、両側乳腺切除済
	CBC21006	10y	FS	Japan cat	no info.		片側乳腺切除済。
	CBC21007	10y	FS	Mix	no info.		FMT cell was stopped culture
	CBC21008	9y 5m	FS	Mix	no info.	Lymph node	左右リンパ節転移あり
	CBC21009	11y	FS	Norwegian Forest Cat	no info.
	CBC21014	7y 7m	FS	Singapura	no info.	Lymph node
	CBC21016	14y 2m	FS with surgery	Japan cat	no info.	Lymph node
	CBC21017	10y 7m	FS	American curl	no info.
	CBC22001	10y 9m	FS	Mix	no info.
	CBC22002	10y 8m	FS	Mix	no info.	Lymph node
	CBC22005	11y 1m	FS with surgery	Mix	Grade2	Lymph node	左右リンパ節転移あり
	CBC22006	11y	F	Scottish Fold	Stage 4	Lung
	CBC22007	14y 1m	FS	Mix	no info.	Lymph node
	CBC22011	14y	F	Mix	no info.	Lymph node	腋窩腫瘤あり
	CBC22013	9y 1m	F	Mix	no info.	Lymph node	右側乳腺全摘出、リンパ節転移あり？
	CBC22014	11y	FS	Mix	no info.	Lymph node
	CBC22016	12y 1m	FS	Mix	no info.	Lymph node
	CBC22017	13y 2m	FS	American Short Hair	no info.
	CBC23003	12y	F	Mix	no info.		FNAで乳腺癌の再発が疑われた。リンパ節転移、肺転移は認められていない。
	CBC23005	14y 9m	FS	Japan cat	no info.	Lymph node	第3～4乳腺・リンパ節切除。
	CBC23006	9y 10m	F	American Carl	Grade1		右側乳腺：乳管拡張、 左側第3～4乳腺：乳腺癌 Grade1 明らかなリンパ節転移なし。
	CBC23008	17y	FS	Mix	no info.		死亡のためキャンセル	1389
	CBC23010	11y 6m	FS with surgery	Bengal	no info.	Lymph node	乳腺癌およびリンパ節転移
	CBC23013	14y 10m	FS	Mix	no info.	Lymph node	乳腺腺癌 脈管内浸潤、鼠経リンパ節への転移あり
	CBC23027	10y	FS with surgery	Mix	no info.	Lymph node

## Sheet: Table.4 Supplement
2x supplement
name	company	catalog number	stock concentration	Amount	final concentration
Advanced DMEM/F12 (1x)	Gibco	12634-010		500 ml
HEPES	Dojindo	342-01375	1M	1 ml	2 mM
GlutaMAX-1 (100x)	gibco	35050-061		10 ml
nicotinamide (NIC)	Sigma	N0630	1M	10 ml	20 mM
NAC	LKT Laboratories	A0918	500 mM	2 ml	2 mM
A83-01	Adooq Bioscience	A12358	5 mM	10 ul	1 uM
Penicillin-Streptomycin Solution (100x)	WAKO	168-23191		10 ml
CBC media
name	company	catalog number	stock concentration	Amount	final concentration
L-WNR conditioned medium as a source of 50% Wnt, Noggin and R-Spondin	Prepared in Lab from L-WRN cells (CRL-3276TM)			25 ml
2x supplement				25 ml
EGF	PeproTech	AF-100-15	500 ug/ml	5 ul	50 ng/ml
FGF7	Peprotech	AF-100-19	10 ug/ml	25 ul	5 ng/ml
FGF10	Peprotech	AF-100-26	25ug/ml	40 µｌ	20 ng/ml
TGFα	Peprotech	120－10C	20ug/ml	50 µｌ	20 ng/ml
B-27 supplement (50x)	gibco	17504-044		1 ml
Primocin	Nacalai tesque	14860	50 mg/ml	100 ul	100 ug/ml
Preservation buffer
name	company	catalog number	stock concentration	Amount	final concentration
Advanced DMEM/F12 (1x)	Gibco	12634-010		500 ml
HEPES	Dojindo	342-01375	1M	1 ml	10 mM
GlutaMAX-1 (100x)	gibco	35050-061		5 ml
Penicillin-Streptomycin Solution (100x)	WAKO	168-23191		5 ml

## Sheet: Table.5 SiRNA
	f-LMTK3	f-LMTK3		arrangement	company			f-FADS2	f-FADS2		arrangement	company
	siRNA-1	SiRNA-1	s	AGCCGACCUUCGUAGUUCAdtdt	nippongene			SiRNA-1	SiRNA-1	s	AGCCCAACAUCUUCCACAAdtdt	nippongene			Si-Cont arrangement is private.
			as	ugaacuacgaaggucggcudTdT						as	uuguggaagauguugggcudTdT
	siRNA-2	SiRNA-2	s	GAGAUUUUCUCCGACUACAdtdt	nippongene			SiRNA-2	SiRNA-2	s	GUUCAUCAUUGGCCACUAdtdt	nippongene
			as	uguagucggagaaaaucucdTdT						as	uaaguggccaaugaugaacgTdT
								SiRNA-3	SiRNA-3	s	AGCACGGCAUUAAGUACCAdtdt	nippongene
	h-LMTK3	h-LMTK3		arrangement	company					as	ugguacuuaaugccgugcudTdT
	SiRNA-5	SiRNA-1	s	GCAACUACAAGGAGGACUAdTdT	sigma
			as	UAGUCCUCCUUGUAGUUGCdTdT				h-FADS2	h-FADS2		arrangement	company
	SiRNA-13	SiRNA-2	s	GAUGUCGGCUUCAAGGAAUdtdt	nippongene			SiRNA1	SiRNA-1	s	UGACCAUGAUCGUCCAUAAdtdt	nippongene
			as	auuccuugaagccgacaucdTdT						as	uuauggacgaucauggucadTdT
	SiRNA-14	SiRNA-3	s	GCUGCCGUUUCUGCUGAUUdtdt	nippongene			SiRNA2	SiRNA-2	s	UCCGGUUCUUCAUCACCUAdtdt	nippongene
			as	aaucagcagaaacggcagcdTdT						as	uaggugaugaagaaccggadTdT
								SiRNA3	SiRNA-3	s	UUGCAUGGUUCACUGUCUUdtdt	nippongene
										as	aagacagugaaccaugcaadTdT

## Sheet: Table.6 HBC case info.
	Patient no.	Age	Sex	Tumor site	Size of tumor (mm)	TNM	Pathological grade	Histological type	Lymph node status	Primary or Metastasis	Chemotherapy received
	HMT23001	65	Female	Left UOQ	35×20	Ｔ２Ｎ1Ｍ0	Ⅲ	Invasive ductal	positive	Primary	non traetment
	HMT23002	71	Female	Left UOQ/LOQ	5.7×3.5	Ｔ２Ｎ0Ｍ0	Ⅲ	Lobular	negative	Primary	non traetment
	HMT23003	81	Female	Left UOQ	22	Ｔ２Ｎ0Ｍ0	Ⅲ	Muchinous	negative	Primary	non traetment
	HMT23004	79	Female	Left UIQ	26×14	Ｔ２Ｎ0Ｍ0	ⅡA	Muchinous	negative	Primary	non traetment
	HMT23005	49	Female	Right UIQ	22×12	Ｔ２Ｎ0Ｍ0	Ⅲ	Invasive ductal	positive	Primary	non traetment
	HMT23006	76	Female	Right UOQ	25×17	Ｔ２Ｎ0Ｍ0	Ⅲ	Invasive ductal	negative	Primary	non traetment
	HMT23007	55	Female	Right UOQ	22×17	Ｔ２Ｎ0Ｍ0	Ⅲ	Invasive ductal	negative	Primary	non traetment
	HMT23008	87	Female	Ledt LOQ/LIQ	22×18×10	Ｔ２Ｎ0Ｍ0	Ⅲ	Invasive ductal	negative	Primary	post-operative
	HMT23009	81	Female	Left UOQ	24.5×26.2	Ｔ２Ｎ１Ｍ0	Ⅲ	Invasive ductal	positive	Primary	non traetment
	HMT23010	57	Female	Right UOQ	1900-01-05	Ｔ２Ｎ１Ｍ0	Ⅲ	Invasive ductal	positive	Primary	non traetment
				UOQ : upper outer quadrant
				UIQ : upper inner quadrant
				LOQ : lower outer quadrant
				LIQ : lower inner quadrant
