# Supplementary material for: Novel organoid-based exploration reveals the role of LMTK3/FADS2 signaling in metastatic breast cancer progression in felines and humans
Source: Research Square preprint supplement (doi:10.21203/rs.3.rs-7396289/v1), 2025-09-09
Supplement: Supplementary file 2 [file 6b7d8588c9fcd084b42d6640.docx]

**
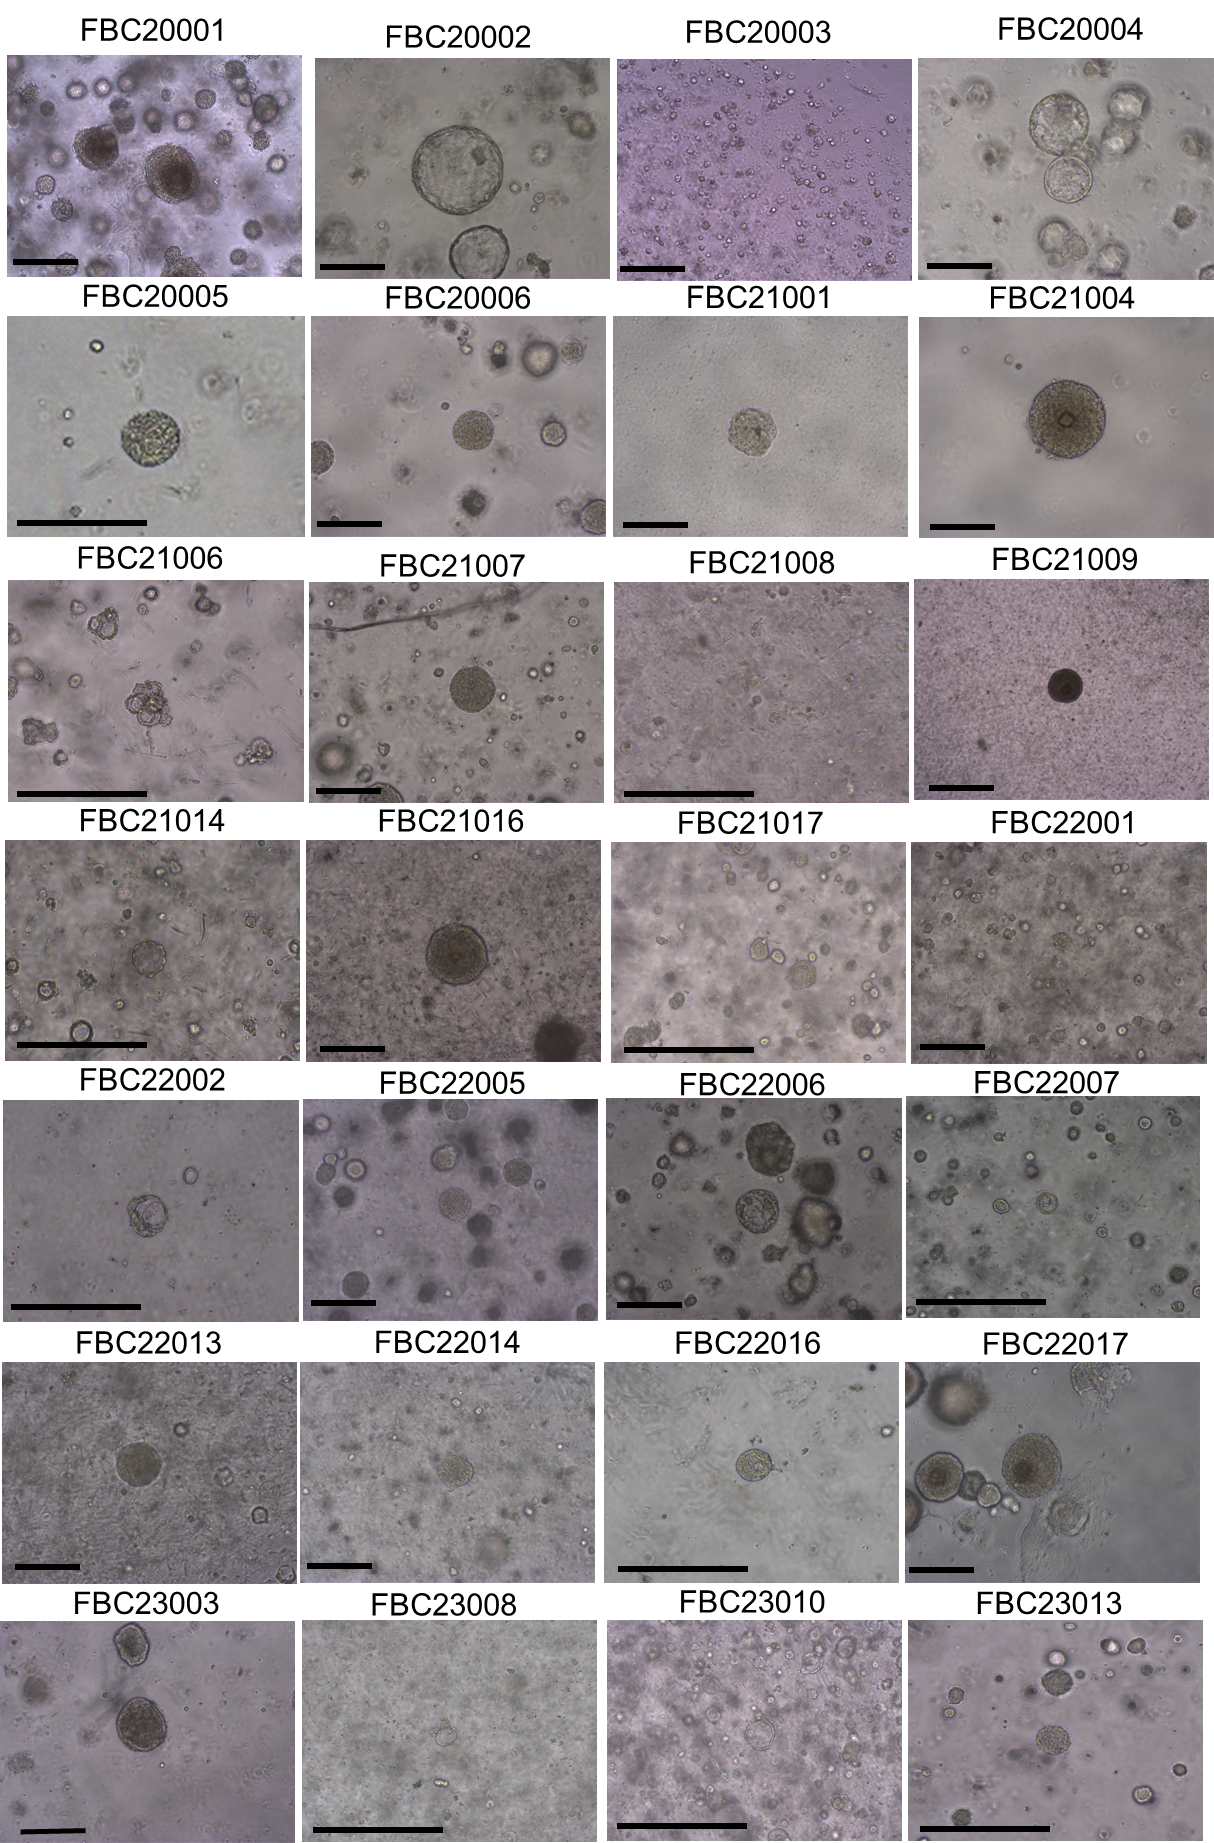
**

**Fig. S1.** Feline breast cancer (FBC) organoids. Representative bright-field images of FBC organoids from each case. Scale bar: 250 m


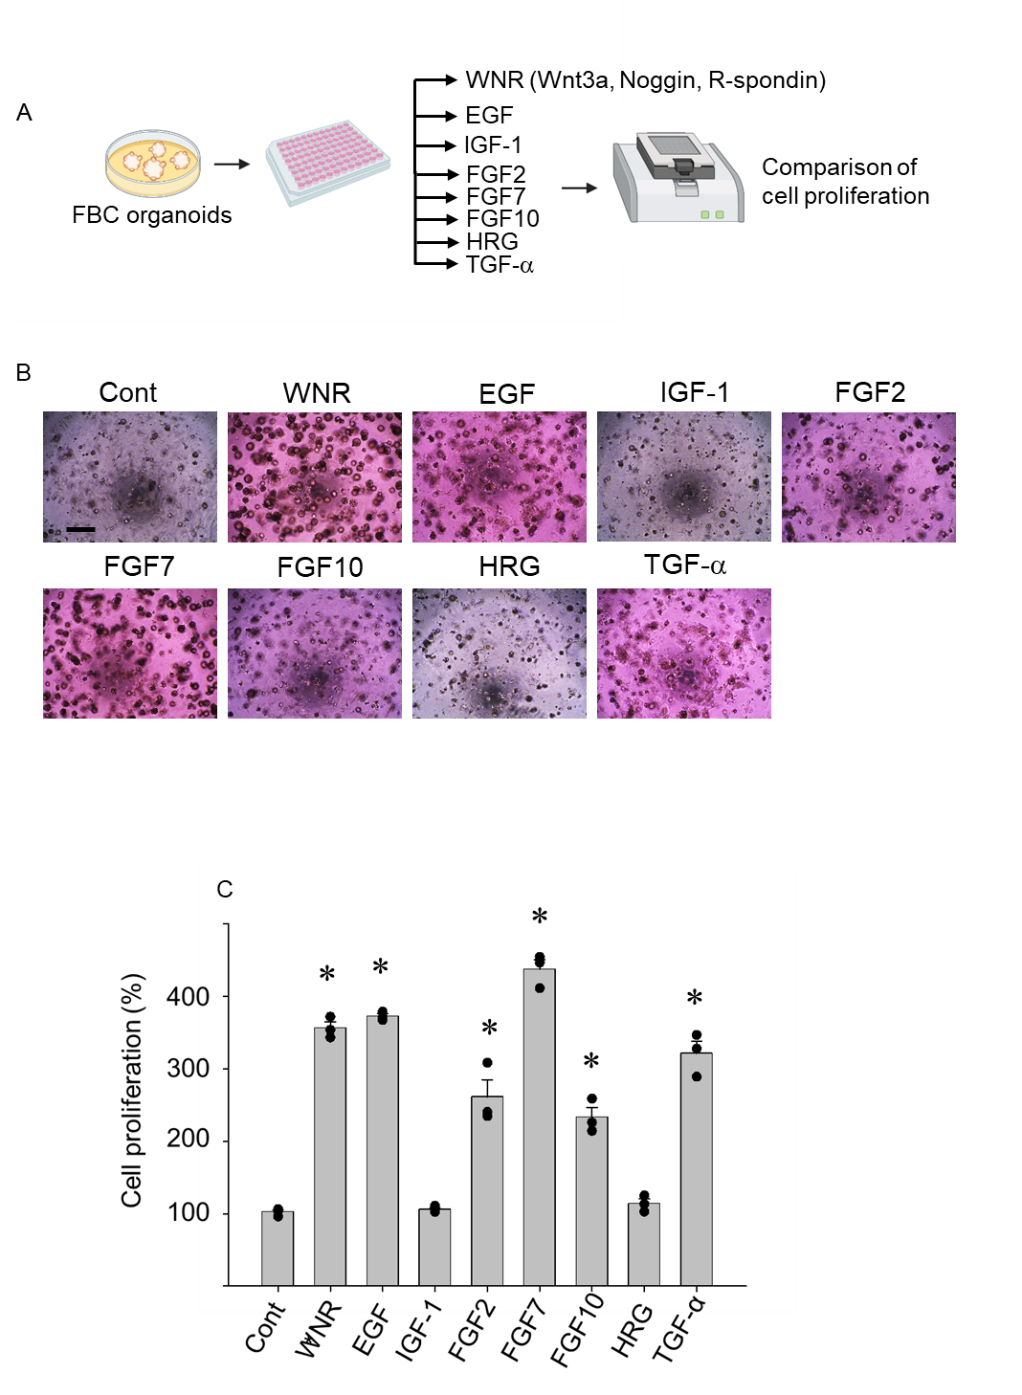


**Fig. S2.** Search for suitable media components of FBC organoids. Experimental schema in (A). Representative bright-field images (B) show the effects of different supplements on FBC organoid growth, scale bar: 500 m. Cell proliferation of FBC organoids after treatment of each supplement was quantified by cell proliferation assay. (C) Results were expressed as mean ± S.E.M. n=3. *P*<0.05 vs. Cont.


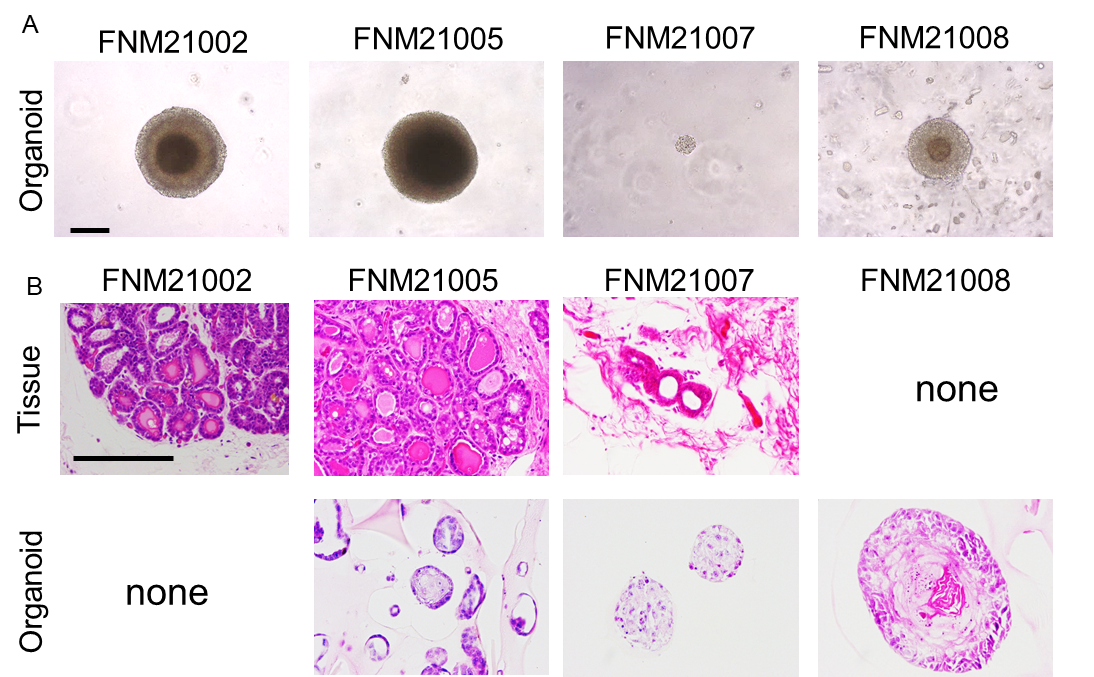


**Fig. S3.** Feline normal mammary (FNM) organoids. (A) Representative bright-field images of FNM organoids in (B), scale bar: 200 m, and H&E staining of FNM organoids and their original tissues were also shown in (B), scale bar: 200 m.


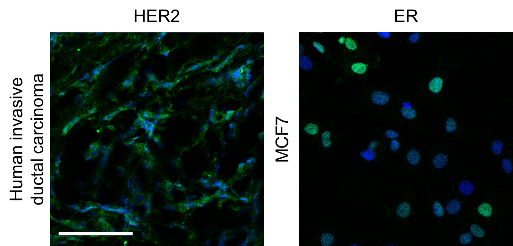

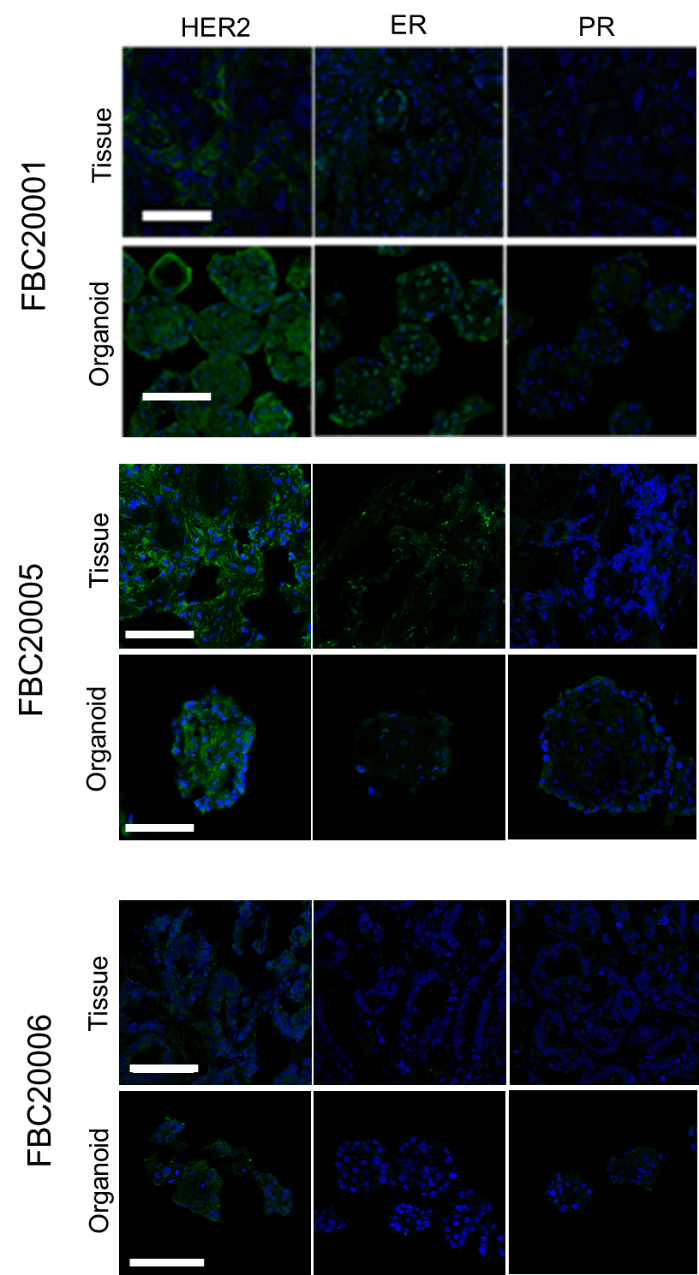


**Fig. S4.** Representativeexpression of hormone receptors in FBC organoids was observed. Human epidermal growth factor receptor (HER2), estrogen receptor (ER), and progesterone receptor (PR) expression in other cases of FBC organoids and their original tissues was evaluated. Three cases of representative photomicrographs are shown. Scale bar: 100 µm. Human invasive ductal carcinoma tissue (HER2) and MCF7 (ER) were used as positive controls for IF.

**
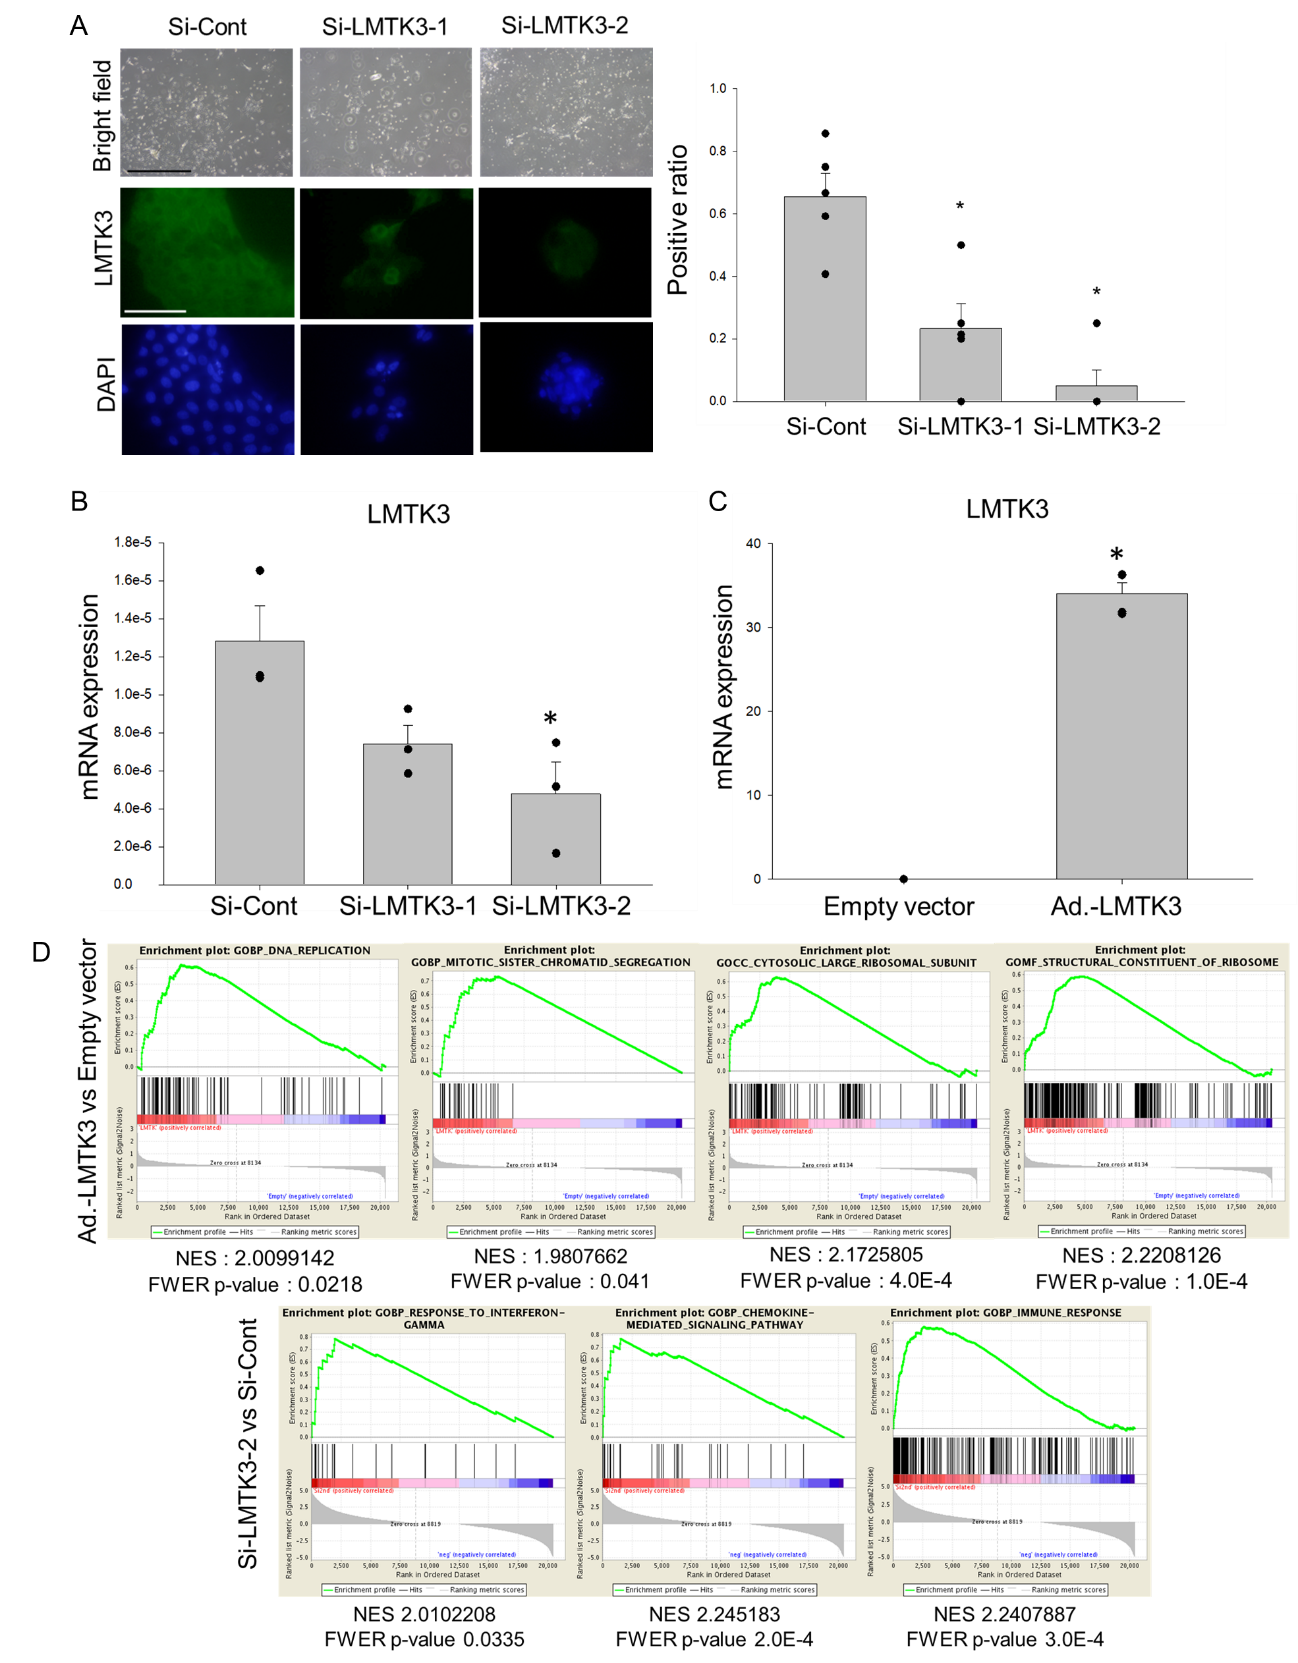
**

**
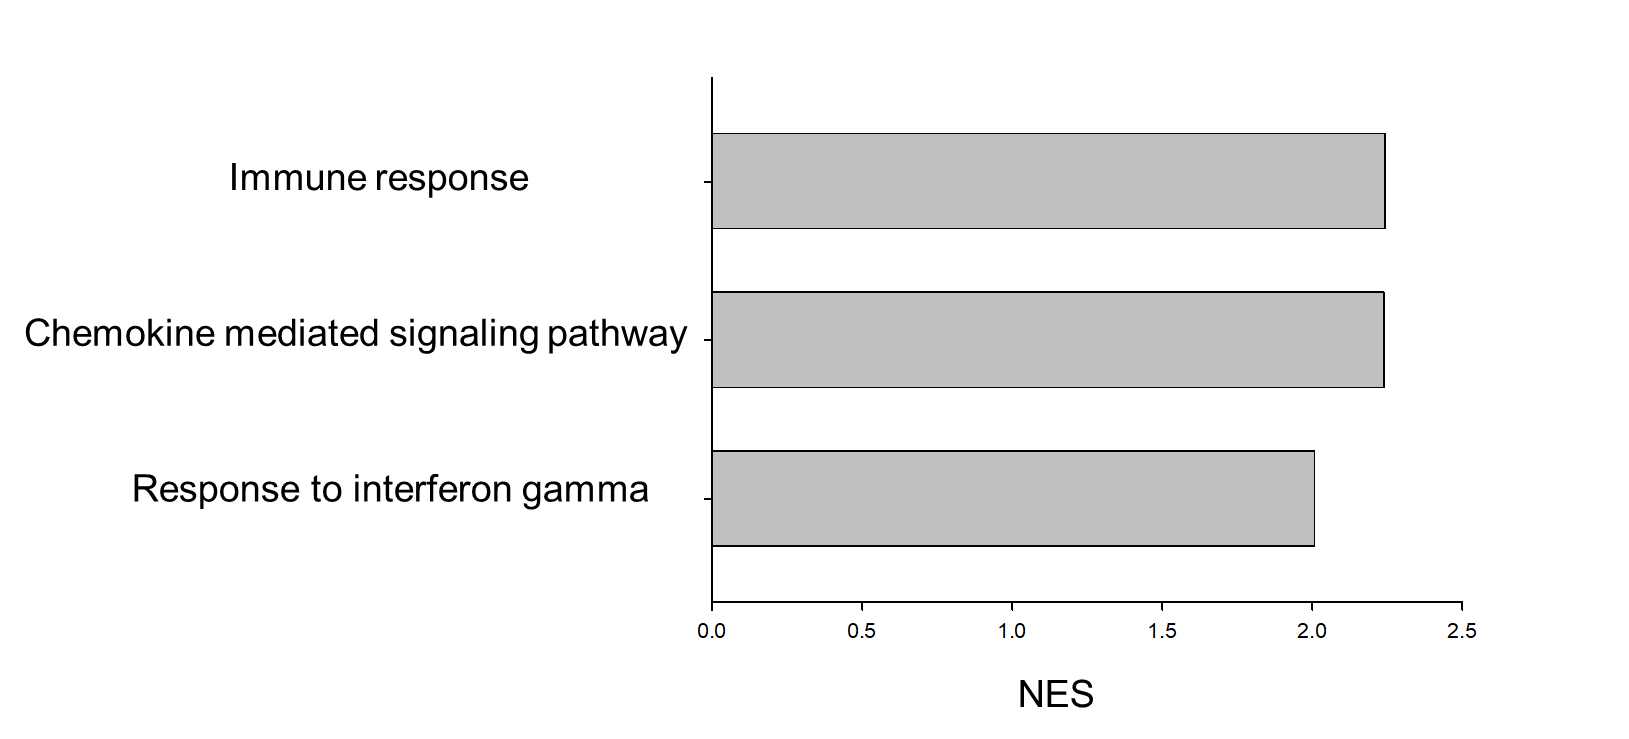

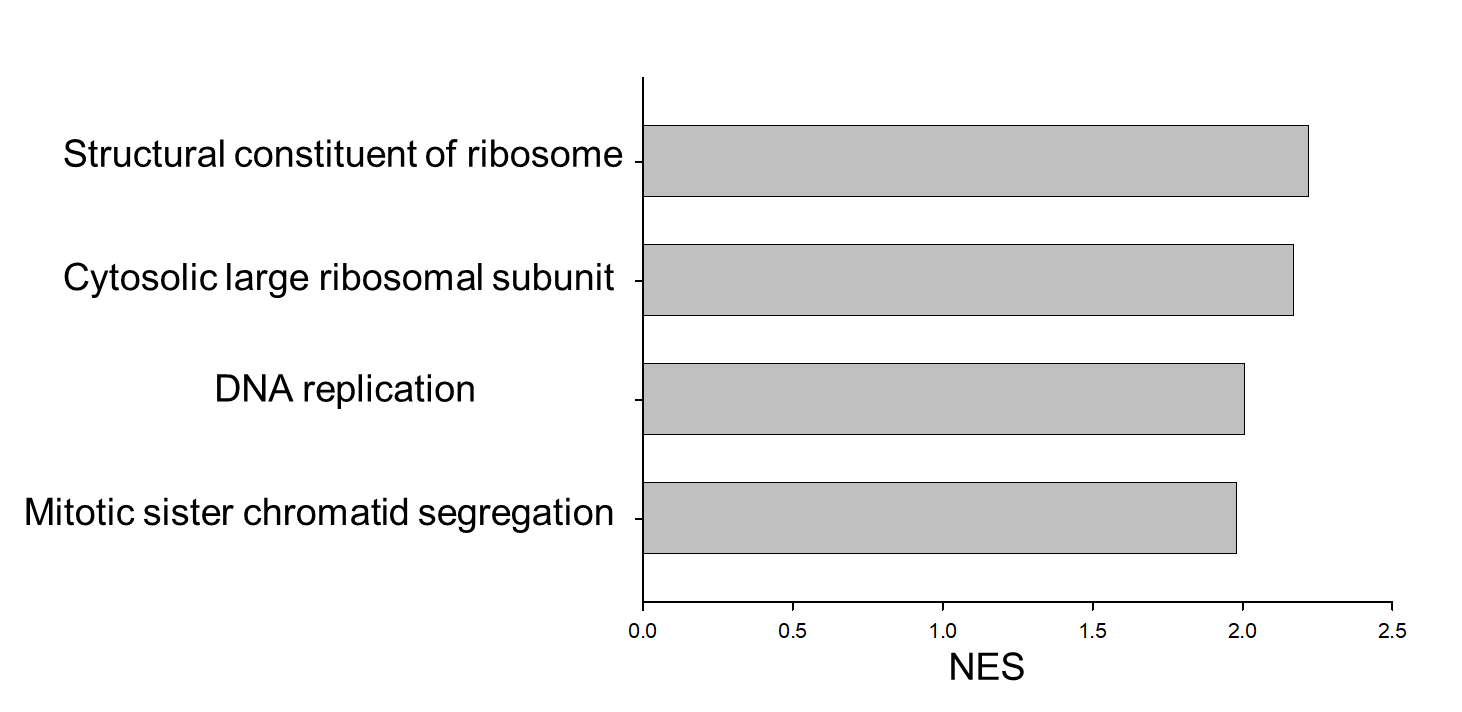
**

**Fig. S5.** RNA sequencing using FBC organoid, downstream signal of *LMTK3* in FBC organoids was explored. Efficacy of *LMTK3* gene knockdown on LMTK3 protein expression in FBC organoids was evaluated by IF. Results were expressed as mean ± S.E.M. n=5. *P*<0.05 vs. Si-Cont., scale bar: 100 m (A). Efficacy of *LMTK3* gene knockdown on *LMTK3* mRNA expression in FBC organoids was evaluated by quantified PCR. Results were expressed as mean ± S.E.M. n=3. *P*<0.05 vs. Si-Cont, scale bar: 100 m (B). Efficacy of overexpression of *LMTK3* gene on *LMTK3* mRNA expression in FBC organoids was analyzed. Results were expressed as mean ± S.E.M. n=4. *P*<0.05 vs. Cont. (C). In Gene Set Enrichment Analysis (GSEA) from RNA-Seq data, some pathways related to ribosome structure or immune response were activated along with LMTK3 behavior (D). Horizontal axis graph in (D) shows normalized enrichment score (NES) in some pathways.


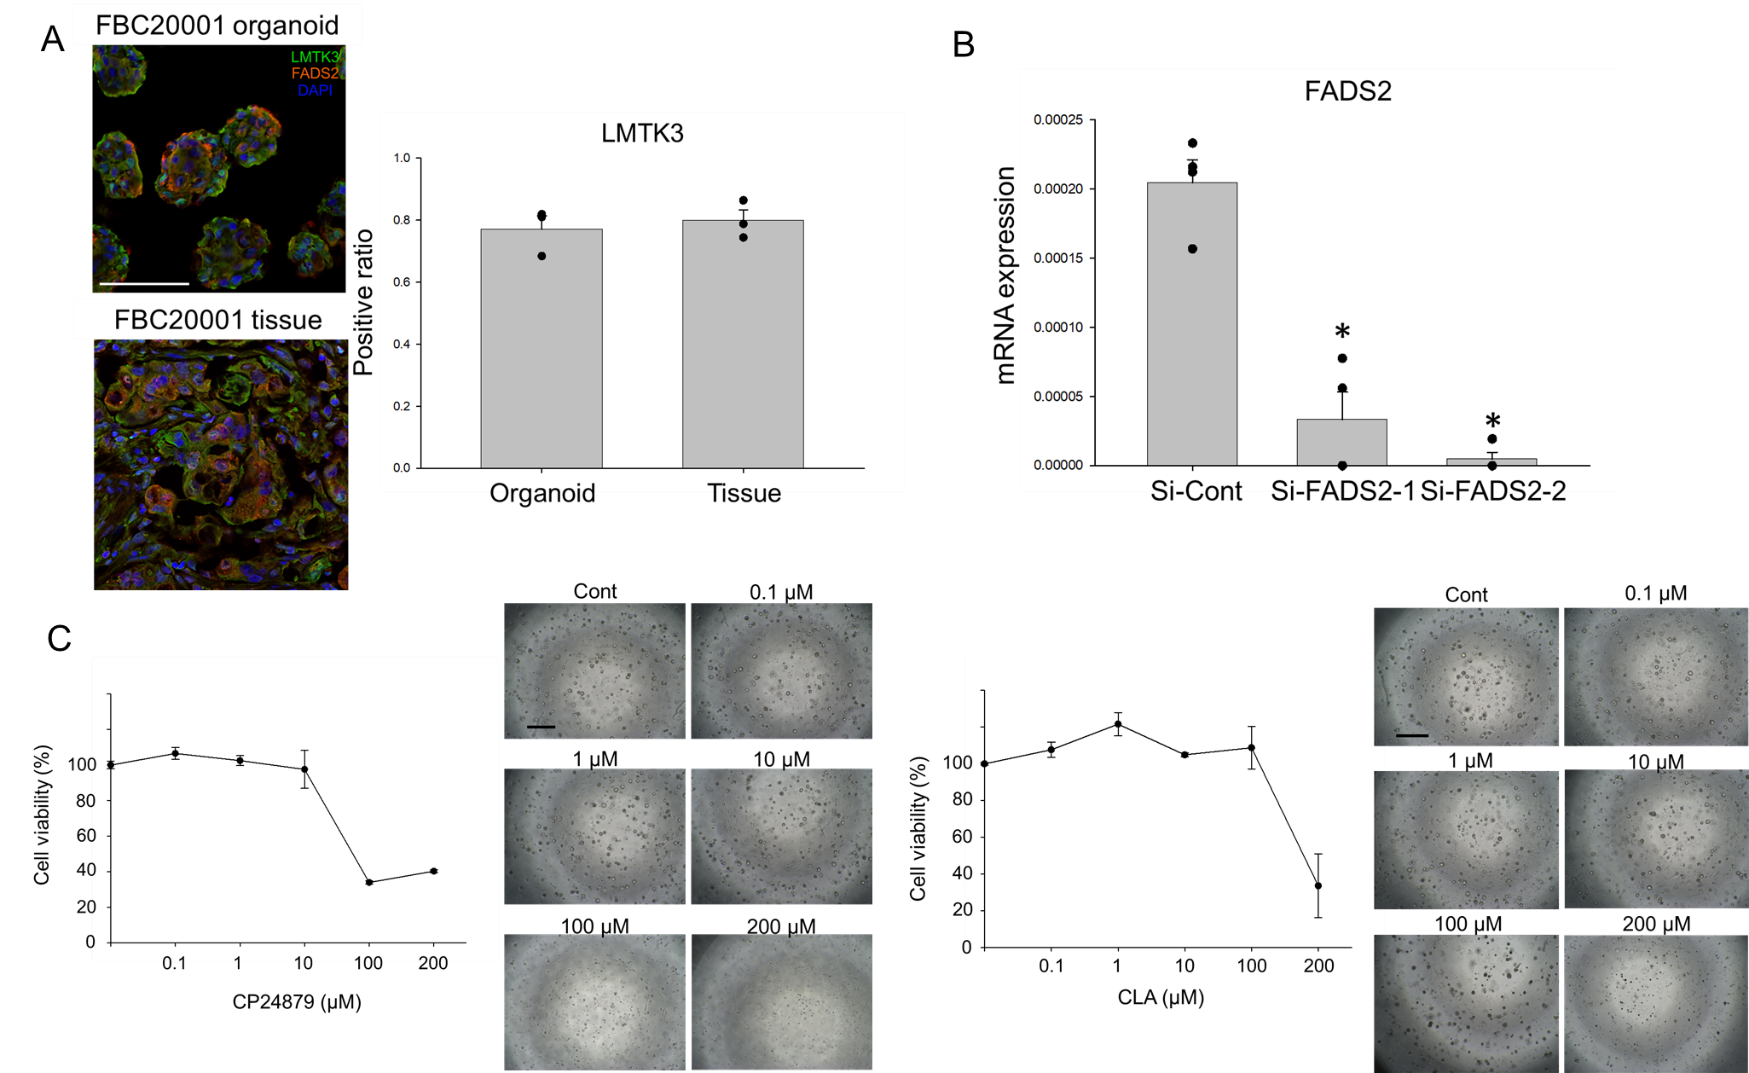


**Fig. S6.** Role of FADS2 in FBC organoids. Co-localization of LMTK3 and FADS2 proteins in FBC organoids and their original tissues by IF was observed. Scale bar: 100 m. Results were expressed as mean ± S.E.M. n=3 (A). SiRNA efficiency was evaluated by qPCR and (B) shows efficacy of *FADS2* gene knockdown on *FADS2* mRNA expression in FBC organoids. Results were expressed as mean ± S.E.M. n=4. *P*<0.05 vs. Si-Cont. Effects of *FADS2* inhibitors, CP24879, and conjugated linoleic acid (CLA) on cell viability in FBC organoids was shown. In high concentration treatment of these drugs, drug effect was confirmed. Results were expressed as mean ± S.E.M. n=3, scale bar: 500 m (C).
